# Supplementary material for: Measuring stress in podiatric students in Spain: psychometric validation and adaptation of the KEZKAK questionnaire
Source: PeerJ. 2020 Dec 9;8:e10439. doi: 10.7717/peerj.10439 (PMC7733331; doi:10.7717/peerj.10439)
Supplement: Supplemental Information 1 — Rows: students; columns: data. Gender (man = 0; woman = 1) age; job (yes = 1, no = 0); K (number of questionnaire questionnaire); SAE (number of STAI questionnaire); FAC (Confirmatory Analysis Factor) [file peerj-08-10439-s001.xlsx]

## Sheet: Sheet 1
ID	Gender	Age	Job	K1	K2	K3	K4	K5	K6	K7	K8	K9	K10	K11	K12	K13	K14	K15	K16	K17	K18	K19	K20	K21	K22	K23	K24	K25	K26	K27	K28	K29	K30	K31	K32	K33	K34	K35	K36	SAE1	SAE2	SAE3	SAE4	SAE5	SAE6	SAE7	SAE8	SAE9	SAE10
1	0	22	0	1	3	3	3	2	2	2	1	1	1	0	0	1	2	1	3	3	1	3	1	3	1	1	1	1	2	2	2	1	0	0	2	0	2	1	3	1	1	2	2	1	1	3	1	2	1
2	0	38	1	2	3	2	1	1	1	1	0	1	1	0	2	1	1	1	2	2	3	1	1	1	1	1	1	1	2	1	1	1	1	2	3	0	3	0	3	2	2	2	1	2	2	1	1	0	2
3	1	21	0	0	0	2	0	1	1	2	3	0	1	1	1	2	1	3	2	3	2	2	2	3	2	0	0	3	2	3	2	1	0	1	3	1	3	0	3	1	2	0	0	3	0	0	0	0	2
4	1	23	0	0	2	2	2	3	3	3	2	3	3	3	2	3	3	3	3	2	1	3	3	3	3	2	3	3	2	3	3	2	2	2	2	1	2	1	3	1	1	2	1	1	2	2	1	2	1
5	0	27	1	0	1	1	0	1	1	0	0	0	0	0	0	0	1	0	1	1	0	1	0	0	0	0	0	0	0	0	0	0	0	0	0	0	0	0	0	2	2	1	1	2	0	1	0	1	1
6	1	21	0	1	2	2	1	2	1	2	1	2	1	1	1	1	2	1	1	1	1	2	1	2	1	1	2	2	2	2	1	1	1	1	1	2	2	2	3	2	1	2	2	1	1	1	2	1	1
7	0	21	0	0	1	0	0	1	1	1	0	2	1	1	1	1	2	1	1	1	1	1	2	2	1	2	2	2	2	2	1	2	2	1	2	1	1	2	2	1	1	1	1	2	1	2	2	2	1
8	1	21	0	0	0	1	1	1	1	1	1	1	1	1	1	2	2	2	2	2	1	1	2	2	2	2	3	2	3	2	2	2	3	2	2	1	2	3	3	0	0	3	2	0	3	3	0	3	1
9	1	21	0	2	3	3	3	3	3	3	3	3	2	2	1	3	3	3	3	2	2	2	3	3	3	2	3	3	3	1	3	2	2	2	1	1	2	3	3	3	2	0	0	1	3	3	0	3	3
10	1	22	0	1	0	1	0	1	1	1	0	1	1	1	1	0	1	1	2	2	1	2	2	3	1	1	2	1	1	1	1	0	1	2	2	1	1	2	2	0	1	1	1	1	1	0	0	1	0
11	1	21	0	1	0	0	0	0	0	0	1	0	2	1	2	0	0	0	0	0	1	0	3	2	1	1	0	3	1	2	1	0	2	1	3	0	1	0	2	3	3	1	1	3	0	1	3	1	2
12	1	26	1	2	2	0	1	0	2	0	1	0	0	1	0	2	0	0	0	0	0	1	1	3	0	0	0	2	1	3	2	1	1	2	3	0	3	0	3	2	1	0	1	1	0	0	3	0	3
13	0	59	1	0	0	2	2	2	2	2	2	2	2	2	1	2	1	2	2	2	2	2	1	2	1	3	2	1	2	2	1	2	3	1	2	1	1	3	2	2	2	0	0	2	0	0	0	0	2
14	1	21	0	1	1	1	0	0	1	1	2	2	2	2	0	0	2	1	0	1	2	1	2	2	1	0	0	2	2	2	2	1	0	0	0	0	1	0	2	2	1	0	0	3	0	3	3	0	2
15	0	22	1	2	2	2	2	2	3	3	0	1	2	1	2	2	3	2	2	2	2	2	2	2	1	2	2	1	2	3	2	2	2	1	2	1	2	2	2	2	2	2	1	2	1	2	3	2	2
16	1	21	0	1	1	1	0	1	1	1	0	2	0	0	1	0	1	0	1	1	1	1	0	0	0	0	0	0	1	1	0	0	2	1	2	0	1	0	1	2	1	0	1	2	0	0	2	0	0
17	1	24	1	1	1	1	0	1	1	1	0	2	0	0	1	0	1	0	1	1	1	1	0	0	0	0	0	0	1	1	0	0	2	1	2	0	1	0	1	2	1	0	1	2	0	0	2	0	1
18	1	23	0	1	2	1	1	2	1	2	1	1	1	1	1	1	1	1	2	3	1	2	1	1	2	1	1	2	2	2	1	2	1	1	1	1	2	1	3	1	1	1	1	1	1	2	1	1	1
19	1	24	0	1	1	1	0	1	1	1	2	2	1	1	1	2	2	1	2	1	1	1	1	1	1	2	2	1	2	2	1	1	2	1	1	3	2	3	2	2	2	0	0	3	0	1	0	0	2
20	1	22	0	0	1	1	0	1	1	0	2	0	0	2	0	1	2	1	1	2	1	1	2	3	2	1	3	2	2	1	2	2	2	2	2	2	2	3	3	3	3	0	0	3	0	1	2	0	2
21	1	25	0	1	1	0	0	1	2	1	3	1	1	3	3	3	3	3	1	1	5	5	1	2	5	5	1	1	2	1	1	1	1	1	2	2	2	3	5	3	5	2	2	2	1	1	1	1	2
22	1	24	0	1	2	1	0	1	2	1	1	0	0	1	2	0	0	0	1	3	2	2	0	0	0	1	0	0	0	1	1	0	0	0	3	0	1	0	2	1	1	3	2	1	2	0	0	1	1
23	0	22	0	1	3	2	2	2	2	3	0	1	1	0	1	1	2	1	2	1	1	2	2	1	1	1	1	1	2	0	0	0	0	0	1	0	1	1	3	2	2	1	1	1	2	3	1	1	0
24	1	21	0	1	2	1	0	1	1	1	1	1	0	1	1	1	1	1	2	2	2	2	0	1	1	1	1	1	1	1	1	2	1	1	1	1	1	2	1	2	2	1	2	2	1	2	1	2	0
25	1	22	1	2	3	2	1	1	2	1	0	1	1	1	1	2	0	1	0	2	3	3	3	1	1	3	3	1	1	2	1	2	1	2	1	1	1	3	3	2	1	1	2	0	1	1	2	3	0
26	0	25	0	0	1	1	1	1	1	2	1	2	1	1	1	1	3	3	3	2	1	2	1	3	2	2	3	2	2	2	2	1	2	2	3	2	2	3	3	2	2	0	1	2	1	1	1	1	1
27	1	23	1	1	3	3	0	1	2	2	1	2	1	1	1	0	2	1	3	2	2	2	0	2	2	2	3	2	2	1	2	1	1	1	1	1	1	1	2	2	2	1	2	2	0	3	2	1	2
28	1	23	1	0	2	2	2	2	2	2	1	1	1	1	3	2	2	3	3	3	2	2	2	2	2	2	3	2	2	1	1	1	1	1	3	3	2	1	2	3	3	1	0	2	1	2	2	1	2
29	0	37	1	0	2	2	2	2	2	2	0	0	0	0	3	2	0	3	3	3	2	2	2	2	2	2	3	2	2	1	1	1	1	3	3	0	2	1	2	3	3	1	0	2	1	2	2	1	2
30	0	48	1	1	3	3	2	1	2	1	0	0	0	0	0	1	1	1	2	1	1	1	0	2	1	1	1	1	1	1	0	0	0	2	2	0	1	1	2	2	2	0	0	2	0	0	1	0	3
31	1	23	1	0	3	3	3	3	3	3	2	3	3	1	2	2	3	3	2	2	3	2	2	3	2	2	2	2	3	3	2	1	3	3	3	3	3	3	3	3	2	1	0	2	0	0	3	0	3
32	0	21	1	1	3	2	1	2	1	2	1	1	1	1	1	3	2	3	2	2	2	2	2	2	1	2	1	3	3	1	2	2	2	2	3	1	2	1	2	1	2	1	2	0	2	1	1	2	1
33	0	23	0	2	2	2	3	2	3	2	2	2	2	3	1	3	2	3	3	3	2	2	1	2	2	3	3	2	2	2	2	2	3	2	2	1	2	3	2	2	2	1	2	0	1	1	1	1	0
34	0	26	0	1	2	2	1	2	1	1	1	1	2	1	1	1	1	1	1	1	2	2	1	2	2	2	0	2	2	2	1	2	1	2	1	2	1	2	1	2	1	2	3	1	2	3	2	1	3
35	1	22	0	0	0	0	0	0	0	0	2	0	1	0	3	0	0	0	0	0	2	0	1	3	0	0	0	2	1	0	0	0	0	1	0	0	0	0	1	3	2	0	0	3	0	0	2	0	2
36	0	22	1	1	1	1	0	1	1	1	0	0	0	0	0	0	1	0	1	1	0	1	0	1	1	0	0	1	2	1	1	0	0	0	0	0	0	0	1	2	2	2	1	2	1	0	0	1	2
37	1	21	0	1	1	1	1	1	1	1	1	2	1	2	1	1	2	2	3	2	1	2	1	1	1	2	3	1	2	1	2	2	2	2	1	1	1	1	1	1	1	1	1	2	2	2	1	2	1
38	1	21	0	0	2	2	1	2	3	2	3	3	2	0	1	2	2	2	3	3	2	2	1	2	2	0	2	2	2	0	2	0	0	2	2	0	1	3	1	3	2	1	1	2	1	2	0	0	2
39	0	32	1	0	2	1	1	2	1	0	0	0	0	1	1	0	1	1	1	1	1	1	0	2	2	1	1	0	2	2	2	2	2	0	0	0	0	0	1	3	2	0	0	2	0	1	2	0	2
40	1	23	1	0	1	1	1	1	1	1	0	2	1	1	0	2	1	1	1	1	1	1	0	0	0	1	1	0	1	0	1	1	1	1	1	0	1	1	1	2	2	0	0	3	1	1	3	0	3
41	1	23	1	1	1	0	1	1	1	0	0	0	0	0	0	0	1	1	1	1	0	1	0	1	1	1	0	0	1	1	1	1	0	0	0	0	0	0	3	0	0	2	0	3	2	2	0	0	0
42	1	20	0	0	3	3	3	3	3	3	3	3	3	3	3	3	3	3	3	3	1	3	3	3	3	3	3	3	3	3	3	3	3	3	3	3	3	3	3	2	2	1	0	2	0	2	3	0	2
43	1	20	0	0	3	3	3	3	3	3	3	3	3	3	3	3	3	3	3	3	2	3	3	3	3	3	3	3	3	3	3	3	3	3	3	3	3	3	3	1	1	3	2	1	2	0	1	1	2
44	1	21	0	0	2	2	1	2	2	1	1	1	1	1	1	1	2	1	1	2	1	2	1	2	2	1	0	0	2	1	2	1	1	1	1	0	0	0	2	1	1	1	1	1	0	0	1	1	2
45	1	21	0	0	3	1	0	1	2	0	0	1	0	0	0	1	3	2	2	2	0	1	1	3	1	0	1	0	2	1	1	0	1	1	1	0	1	3	2	1	2	1	0	2	1	1	1	1	2
46	0	21	0	0	2	1	0	1	2	1	1	1	0	0	0	1	2	1	2	2	0	1	1	3	1	0	1	0	1	2	1	1	1	1	1	0	1	3	3	1	2	2	0	2	1	1	1	1	2
47	0	20	0	1	2	2	1	2	1	2	0	0	1	0	1	1	1	1	2	1	1	2	1	1	1	0	0	1	1	0	1	1	0	1	0	0	1	0	2	3	2	1	0	2	0	1	2	0	1
48	1	21	0	0	3	3	2	2	2	2	1	1	2	1	0	1	2	2	1	2	0	2	2	2	2	2	2	0	2	2	2	1	1	1	1	0	3	3	3	1	0	0	0	2	1	2	1	1	1
49	1	22	0	0	1	1	0	1	1	1	2	2	1	0	1	1	2	2	3	3	0	2	1	0	2	2	0	0	1	0	1	1	1	0	1	0	1	0	1	1	3	1	0	3	1	1	0	0	2
50	1	20	0	2	3	3	1	1	3	3	1	2	1	1	2	3	2	3	3	3	3	3	1	2	3	1	3	1	3	2	3	3	3	3	2	3	3	3	2	2	1	1	1	2	1	2	2	1	2
51	1	22	0	2	3	3	3	3	3	3	2	2	3	2	2	3	3	2	2	2	2	2	2	3	3	2	2	2	2	2	3	2	2	3	2	3	3	3	2	2	2	2	2	2	2	2	2	2	2
52	0	20	0	2	3	1	0	3	1	1	0	0	0	1	1	1	1	1	0	2	2	2	0	1	1	0	0	0	1	1	0	0	0	2	1	0	2	0	3	0	1	3	1	1	3	3	2	2	1
53	1	24	0	2	2	3	3	3	2	2	2	2	3	3	3	3	2	2	2	2	2	2	2	2	2	3	0	2	1	1	1	1	1	1	0	2	3	1	2	2	2	0	1	2	1	3	0	2	1
54	1	24	0	2	3	3	3	3	3	2	1	1	1	2	1	3	2	1	3	3	1	2	1	1	1	2	3	1	1	1	1	1	1	1	3	2	1	2	3	2	2	1	0	2	0	1	1	0	1
55	1	24	1	2	3	3	3	3	3	2	2	1	2	1	1	2	2	3	2	3	1	2	2	2	2	2	2	1	2	1	1	1	1	1	2	1	2	3	1	2	2	0	0	3	0	2	1	0	2
56	1	26	1	2	3	2	3	2	3	2	2	2	1	2	2	2	2	2	3	3	2	2	1	1	2	2	3	1	2	1	1	1	1	1	2	1	2	3	1	3	2	1	0	3	0	0	1	0	2
57	1	20	0	1	2	2	3	3	3	3	3	3	2	2	2	3	2	3	3	3	2	2	2	3	2	2	3	2	3	3	3	2	3	2	3	2	3	3	3	1	2	1	0	1	1	1	1	1	1
58	1	26	0	0	2	2	1	2	3	1	1	2	1	0	0	3	1	3	0	2	0	3	1	1	1	2	3	1	3	1	2	1	2	0	2	1	2	1	2	1	2	0	2	1	1	3	0	1	1
59	1	20	0	0	2	2	1	1	3	1	1	1	2	1	2	1	2	3	3	3	2	3	1	3	1	2	3	2	3	2	3	1	3	3	2	2	3	3	3	2	3	1	0	3	0	2	1	2	1
60	1	20	0	1	3	3	3	3	3	3	3	3	1	0	0	3	0	3	3	3	0	2	0	3	3	1	3	1	2	2	2	1	2	0	3	3	1	3	1	2	3	0	0	3	0	0	0	0	2
61	1	22	0	1	2	2	3	3	2	2	1	2	1	2	1	1	2	2	2	2	2	2	1	1	2	2	2	1	2	1	1	1	1	1	2	1	1	2	1	1	2	1	1	2	1	1	1	0	1
62	0	20	0	0	2	2	2	2	2	1	1	1	1	1	0	2	1	2	2	2	0	3	1	1	1	1	3	0	2	2	1	2	2	1	2	0	2	2	2	3	2	2	1	3	0	0	2	0	2
63	1	22	0	1	3	2	1	2	2	3	1	2	1	2	1	0	1	3	2	3	0	3	0	0	1	1	1	1	3	3	1	1	2	1	1	2	2	1	1	2	2	0	0	3	0	0	2	0	2
64	0	32	0	2	3	3	2	3	3	3	1	2	2	1	1	1	2	1	3	3	3	3	2	3	2	1	1	2	2	0	1	2	0	1	0	1	3	2	3	3	3	0	0	3	0	1	3	3	3
65	1	34	1	3	3	2	3	2	1	1	1	1	1	0	1	1	2	1	2	2	0	2	1	1	1	2	2	2	2	3	1	2	3	2	3	3	3	3	1	3	2	0	0	3	0	2	2	1	2
66	0	25	0	1	1	3	3	3	2	2	2	1	1	1	1	1	2	1	3	3	3	3	1	2	2	2	3	1	2	2	1	2	1	2	2	1	1	2	1	1	1	2	0	1	1	2	1	2	1
67	0	25	0	1	3	2	2	2	2	2	0	0	0	0	1	0	0	0	1	3	1	2	1	2	1	0	0	1	2	0	2	3	1	0	0	0	2	0	3	3	1	0	1	2	0	0	2	0	2
68	0	21	0	2	3	3	3	3	3	2	1	1	2	1	3	3	3	3	3	2	2	2	1	2	2	1	3	3	2	2	1	1	1	2	2	1	2	2	3	2	1	0	0	2	0	1	1	1	2
69	0	20	0	2	3	2	3	2	2	2	1	2	1	1	2	3	2	3	2	2	2	2	1	2	2	1	2	2	2	2	1	2	2	2	2	0	2	1	2	2	2	0	0	2	0	0	2	0	2
70	0	20	0	1	1	2	2	2	2	2	2	3	2	3	2	2	2	2	3	2	3	2	1	1	2	3	3	1	3	3	1	1	3	2	2	2	2	3	2	1	1	3	3	1	0	0	1	2	1
71	0	23	0	1	3	3	3	3	3	3	1	2	1	2	2	2	2	2	3	3	1	3	2	2	2	2	2	1	3	2	3	2	2	1	1	2	2	2	3	0	0	3	3	1	3	2	2	2	2
72	1	23	1	0	3	3	2	3	3	3	3	3	2	0	2	1	3	2	3	3	2	3	3	1	3	1	3	1	3	0	3	3	0	0	1	3	3	3	1	2	2	1	0	2	0	0	1	0	2
73	0	20	0	1	0	1	0	2	1	1	0	1	1	1	1	3	2	3	3	3	1	3	1	3	3	2	3	2	3	3	2	3	3	2	2	2	3	3	3	1	1	2	2	1	1	1	0	3	2
74	1	25	0	0	1	1	0	1	1	1	0	1	1	0	0	1	2	1	2	2	0	1	0	1	1	0	1	1	1	1	1	0	1	1	2	1	1	2	2	1	2	0	1	0	0	2	0	2	2
75	0	20	0	2	3	2	3	3	3	3	2	2	2	2	1	3	2	2	2	2	1	2	0	2	2	2	2	2	2	2	2	2	1	2	1	0	2	2	3	2	2	1	1	2	1	0	1	0	1
76	1	22	0	1	2	2	2	1	2	3	1	3	3	3	2	3	2	3	2	2	3	2	1	2	1	1	3	2	2	1	1	1	1	2	2	1	3	3	3	2	1	2	0	3	0	0	3	0	2
77	1	22	0	3	0	0	0	0	0	0	1	2	1	0	2	0	0	0	0	0	2	0	1	3	2	0	0	1	3	0	2	0	1	2	0	2	1	2	2	1	3	1	0	2	0	0	3	0	2
78	0	20	1	1	3	3	3	3	3	3	2	1	2	1	1	2	2	2	2	3	1	3	1	2	2	2	1	2	1	2	1	1	1	1	1	1	0	0	1	3	2	1	0	3	0	2	2	0	2
79	1	21	0	2	3	3	3	3	3	3	2	2	2	2	3	2	3	2	3	3	3	3	1	3	3	2	3	2	2	2	2	3	2	3	2	3	2	2	3	2	2	0	0	2	0	1	0	0	1
80	1	23	0	3	3	3	3	3	3	3	3	3	3	3	3	3	3	3	3	3	3	3	0	1	3	0	3	3	3	1	3	3	1	1	3	3	3	3	3	0	1	3	3	3	2	3	0	3	1
81	1	22	0	1	2	1	2	2	2	3	1	2	2	1	1	2	3	2	3	3	2	2	2	2	2	1	3	2	2	2	1	1	2	2	2	2	2	3	2	1	2	1	0	2	1	1	1	0	1
82	0	22	1	1	2	2	2	2	3	3	2	2	2	3	2	2	2	3	2	3	2	2	2	2	2	3	3	2	3	2	2	3	2	2	2	2	2	3	2	1	2	1	0	2	0	0	1	1	2
83	0	21	0	2	3	3	3	3	3	3	3	3	1	1	1	1	2	3	3	3	2	3	3	1	1	1	2	1	2	1	2	3	2	2	2	0	2	0	3	2	2	1	0	2	0	2	2	1	2
84	0	26	0	1	3	2	0	2	2	1	1	0	0	0	0	0	0	0	2	2	0	3	1	1	2	0	0	0	2	0	0	1	0	1	2	0	1	0	3	2	0	1	1	2	0	2	2	0	2
85	0	20	0	1	3	2	0	2	2	1	1	0	0	0	0	0	0	0	2	2	1	2	1	2	1	2	2	2	1	1	1	2	2	1	1	2	1	1	2	2	2	1	2	2	1	2	2	2	1
86	0	22	0	1	3	3	3	3	3	3	3	3	3	3	3	3	2	3	3	3	3	2	1	3	3	3	3	3	2	2	2	2	2	2	2	2	2	3	2	3	3	0	0	3	0	3	3	3	3
87	0	20	0	2	3	2	2	2	2	3	1	1	1	1	2	1	2	2	2	2	3	3	2	2	1	1	2	2	2	3	2	2	1	2	2	1	2	1	2	1	1	2	1	2	1	2	1	1	2
88	1	20	0	1	2	1	1	2	2	2	2	2	2	2	1	2	1	3	2	2	1	2	1	2	2	3	3	1	2	2	1	1	2	2	2	3	1	3	2	2	1	1	1	2	0	1	1	0	2
89	1	21	0	1	3	3	3	2	3	2	1	3	2	1	1	1	3	1	3	2	1	3	0	3	2	1	3	3	2	2	3	3	3	2	3	3	3	3	3	3	2	0	0	2	0	1	2	0	2
90	1	21	1	2	2	2	3	3	3	2	2	3	2	3	2	2	3	2	3	3	1	2	2	3	3	3	2	2	3	1	2	1	3	1	1	2	2	3	2	2	1	0	0	3	0	0	1	0	2
91	1	20	0	0	2	2	2	3	3	2	2	3	1	3	2	2	3	3	3	2	3	2	1	3	2	3	3	2	2	2	2	2	3	2	2	3	2	3	2	2	2	0	0	2	0	1	1	0	2
92	1	20	0	1	3	2	1	2	3	3	1	3	2	3	2	2	2	3	3	3	2	2	0	3	2	1	3	2	2	2	2	3	3	2	2	3	2	3	2	2	1	0	0	2	0	3	2	0	2
93	1	24	1	0	3	3	3	3	3	3	3	3	1	1	2	3	3	3	3	3	2	3	1	3	2	1	3	2	1	0	1	2	1	0	0	2	1	2	3	2	3	2	0	3	0	0	3	0	3
94	0	21	1	0	3	2	3	2	3	2	0	0	0	0	0	1	3	1	2	0	3	2	0	0	2	0	2	0	1	0	1	2	0	0	3	1	2	3	1	3	3	0	0	3	0	0	2	0	3
95	1	23	0	3	0	0	0	1	0	0	3	2	3	0	3	0	0	0	0	0	3	0	2	3	1	0	0	3	2	1	2	0	0	1	1	0	0	0	1	3	2	1	0	3	0	1	3	0	3
96	1	20	0	2	2	2	2	2	2	2	2	2	2	2	2	2	2	2	2	2	1	2	1	2	2	2	2	2	2	1	1	2	1	1	1	1	1	2	1	3	2	1	2	2	1	7	1	1	2
97	0	20	0	2	3	3	2	2	1	1	1	1	1	2	1	3	2	1	3	2	2	2	2	2	2	2	3	2	1	3	1	3	3	0	2	1	1	3	2	1	2	1	0	3	1	1	1	1	2
98	0	20	0	1	2	1	0	1	0	1	0	0	0	3	1	3	2	3	2	2	3	2	1	2	2	3	1	3	1	2	0	0	0	2	3	1	2	2	3	2	2	1	0	3	0	1	1	0	2
99	1	27	1	2	3	3	3	2	3	2	2	2	0	1	2	2	1	2	2	2	1	2	1	2	1	0	1	1	2	1	2	2	1	1	1	0	1	0	1	2	2	0	1	3	0	1	2	0	2
100	0	20	0	1	1	1	1	2	1	2	2	1	2	2	1	1	2	2	3	3	2	2	0	3	3	2	3	2	2	3	3	2	2	2	2	2	3	3	2	3	2	0	0	3	0	1	2	0	3
101	0	37	1	2	3	2	2	2	2	2	1	1	0	1	1	1	2	1	1	1	1	1	1	1	1	1	1	1	1	1	1	1	1	1	1	1	2	2	2	3	2	0	0	2	0	0	1	0	3
102	1	20	0	0	2	1	0	1	0	0	2	2	2	3	0	3	2	3	2	3	1	2	0	1	2	3	3	0	1	0	0	0	2	1	0	3	0	1	2	3	3	0	0	3	0	1	2	0	3
103	1	22	0	2	3	3	2	3	2	3	1	2	2	1	1	1	3	2	3	2	2	3	2	2	2	1	2	2	3	2	2	3	3	3	2	2	3	3	3	0	2	3	1	1	3	2	0	2	1
104	1	20	0	2	2	3	3	2	3	2	1	3	2	3	2	3	3	3	2	2	2	2	2	3	1	2	2	1	3	3	1	1	1	3	3	3	3	3	3	1	1	2	2	3	0	3	0	2	1
105	1	20	0	2	3	3	3	2	2	3	2	2	3	1	2	1	2	2	3	2	2	3	2	2	1	1	2	2	1	1	1	1	2	2	3	2	1	3	1	2	3	0	0	2	0	3	0	2	2
106	0	26	0	2	1	2	2	1	2	1	1	0	0	2	2	3	2	3	3	2	2	1	0	2	2	2	3	2	2	1	0	2	1	3	1	0	1	3	3	1	3	0	0	3	1	0	1	0	2
107	1	20	0	1		1	2	3	2	2	1	1	2	1	2	1	2	1	2	2	2	1	2	2	1	2	2	2	1	1	1	2	2	2	1	2	1	3	2	1	2	3	1	2	3	1	0	1	1
108	1	22	0	0	1	1	0	1	1	0	2	1	1	3	2	2	2	1	2	2	2	3	2	2	2	2	3	1	2	2	1	2	3	1	2	3	2	3	2	2	2	0	0	3	0	0	0	0	2
109	0	20	0	0	1	0	0	1	0	1	0	1	0	0	0	1	1	1	1	1	0	1	0	0	1	0	0	0	1	0	1	1	0	0	3	0	1	0	0	3	3	0	0	3	0	0	2	0	3
110	1	20	0	0	1	1	0	1	0	1	1	2	2	1	2	1	3	3	3	2	2	2	2	2	3	1	2	2	2	2	2	2	3	2	2	3	2	3	3	2	2	1	0	1	0	2	2	0	2
111	1	39	1	0	2	2	2	1	2	0	1	1	0	2	0	0	1	2	0	0	1	1	1	0	2	2	1	1	1	1	1	0	2	2	2	3	1	3	1	0	2	0	1	2	3	2	3	2	1
112	1	21	0	1	3	3	3	3	3	3	2	3	3	1	1	2	3	1	3	3	2	3	1	3	2	2	3	1	2	2	1	1	2	2	2	1	1	1	3	2	1	0	0	3	0	3	1	1	2
113	1	20	0	0	1	1	0	1	1	0	2	1	1	2	2	2	2	2	2	2	2	3	2	2	2	2	3	1	2	2	1	2	3	3	2	3	2	2	2	2	2	1	0	2	1	0	3	2	2
114	0	25	1	0	1	2	0	2	2	2	2	2	1	2	0	3	2	1	3	2	2	3	1	2	2	2	3	1	2	1	1	1	2	2	1	2	2	2	2	2	2	1	1	1	0	2	1	1	2
115	1	20	0	0	3	3	3	1	2	2	1	1	1	3	2	3	2	3	2	2	3	3	2	2	3	3	3	1	2	3	3	0	2	3	2	3	3	3	3	3	2	1	1	2	1	2	1	1	3
116	1	20	0	0	2	1	2	3	2	2	1	1	1	2	2	0	3	3	1	2	3	3	2	2	2	3	3	3	3	2	2	2	3	2	2	3	2	3	3	3	2	1	1	0	0	0	1	1	0
117	1	20	0	0	2	1	2	1	2	1	3	1	0	0	1	0	3	3	3	2	2	3	3	2	3	2	3	2	1	3	2	1	3	2	1	0	3	1	3	0	2	2	0	1	2	3	0	2	1
118	1	20	0	0	3	3	2	3	3	3	2	2	1	3	2	2	2	2	3	3	3	2	1	3	2	3	3	2	2	3	0	2	3	1	2	3	2	3	3	2	1	1	0	2	1	2	1	2	1
119	1	20	0	0	3	3	3	3	3	3	3	2	2	3	3	2	3	3	3	3	2	3	3	3	3	3	3	2	2	2	2	3	3	3	2	3	2	1	3	1	2	0	0	3	0	2	2	0	2
120	0	20	0	0	3	2	1	2	3	2	1	0	1	2	1	2	3	1	3	3	2	3	0	2	2	1	3	2	2	1	1	3	1	1	2	1	1	0	3	3	3	0	0	3	0	0	2	0	3
121	1	22	1	0	3	3	2	3	3	3	2	3	2	3	2	2	3	3	3	3	3	3	2	3	2	2	3	3	3	2	3	3	2	3	2	2	2	3	3	1	2	0	0	3	1	0	2	1	2
122	1	20	0	0	3	3	3	3	3	2	2	3	2	3	3	1	2	3	3	2	1	3	2	1	2	1	3	3	3	2	2	1	1	1	1	3	2	2	3	2	1	0	0	2	0	1	1	1	1
123	1	20	0	1	3	3	3	3	3	2	2	1	3	3	2	2	3	3	3	2	3	3	2	2	3	3	3	2	2	3	2	2	2	1	3	3	3	2	3	2	2	2	0	2	0	0	0	0	2
124	1	22	0	0	3	3	3	3	3	3	1	1	0	1	2	2	3	3	3	1	3	2	1	3	1	2	2	1	1	2	1	2	2	1	0	3	1	3	3	1	3	0	0	3	0	0	1	1	2
125	1	23	0	0	3	2	2	3	3	3	1	1	1	2	2	2	3	3	3	3	3	3	2	3	2	2	3	3	3	2	1	3	3	2	3	3	2	1	3	3	3	0	0	3	1	0	1	0	2
126	1	20	0	0	1	1	1	0	1	1	0	1	0	1	3	3	3	3	3	2	3	3	2	3	3	2	3	3	3	2	2	2	3	3	2	3	3	3	3	3	3	0	0	3	0	0	3	0	3
127	0	20	0	0	0	0	1	1	1	1	1	2	2	2	1	2	2	2	2	2	2	2	1	2	2	2	3	1	2	2	1	1	2	2	1	1	2	1	2	2	2	0	1	2	1	1	0	1	2
128	0	24	0	0	0	0	1	1	1	0	2	2	2	1	2	1	3	2	2	2	1	2	1	2	2	2	3	3	1	2	2	1	2	1	2	1	1	2	3	2	2	0	1	2	0	3	1	1	3
129	0	20	0	0	2	2	2	2	2	2	2	2	2	1	2	1	2	0	3	2	2	2	1	2	2	2	3	2	2	2	2	2	2	1	2	2	2	1	3	2	2	0	0	3	0	0	1	0	3
130	0	21	0	0	2	2	2	2	2	2	2	2	2	3	2	1	3	3	3	3	2	3	1	2	2	2	3	2	2	2	1	2	1	1	2	2	2	1	2	2	2	0	0	2	0	1	2	1	1
131	1	20	0	0	1	1	0	1	2	2	1	1	0	1	1	1	2	2	2	2	1	2	1	1	1	1	2	1	2	1	1	2	2	1	2	2	2	3	2	2	1	0	0	0	2	2	1	2	1
132	1	22	0	0	1	1	1	0	1	1	0	3	1	1	3	3	3	3	3	3	3	3	2	3	3	3	3	3	2	2	3	2	2	2	2	3	2	3	2	2	1	0	0	3	0	0	1	0	3
133	1	20	0	0	2	2	2	2	2	2	2	2	2	3	2	1	2	3	2	2	3	2	2	2	2	3	3	2	2	2	1	2	3	2	1	2	2	3	2	2	3	0	0	3	0	0	2	0	2
134	1	27	1	1	2	2	2	2	3	2	2	3	2	1	2	3	3	3	3	2	1	2	1	2	1	2	3	1	3	1	2	2	2	1	3	2	2	3	2	2	1	1	1	2	0	3	2	1	1
135	1	23	0	1	3	2	3	2	3	1	2	2	2	1	2	1	2	2	3	2	1	1	1	1	1	1	3	2	2	1	1	2	1	2	1	1	2	3	2	1	1	1	2	2	2	2	1	2	2
136	0	25	0	2	3	3	3	3	3	3	3	3	3	1	3	2	3	2	2	3	3	3	2	3	3	2	3	3	3	2	2	2	2	2	3	2	3	2	3	1	1	2	2	1	1	2	1	2	1
137	1	27	1	1	2	2	2	2	2	2	1	1	0	1	1	2	2	2	2	2	1	2	1	1	2	1	2	1	1	1	1	1	1	1	2	1	2	2	2	2	1	0	0	2	0	1	1	0	2
138	1	20	0	0	2	2	2	2	2	2	2	2	2	3	1	1	3	3	3	3	3	3	2	3	3	3	3	3	3	2	3	2	3	2	2	3	3	2	2	1	3	1	1	3	1	2	1	1	2
139	1	20	0	0	2	1	1	2	1	1	2	1	1	0	0	1	2	2	3	2	1	3	1	2	1	2	3	0	1	1	2	1	2	3	1	0	0	3	2	1	3	0	0	3	1	2	0	1	0
140	1	20	0	2	3	2	2	2	1	2	2	2	1	2	1	3	3	3	2	2	1	3	2	2	1	2	2	0	2	1	0	1	1	2	3	3	3	2	3	1	0	1	0	2	0	2	2	0	1
141	1	31	1	3	3	3	3	3	3	3	2	3	2	3	2	3	3	3	3	3	3	3	2	2	2	3	3	3	1	2	2	2	2	2	2	2	3	3	3	3	3	1	0	3	0	0	2	0	2
142	0	24	0	1	3	2	2	3	3	3	1	1	1	3	2	3	2	2	2	3	2	3	1	2	2	2	3	1	2	2	3	3	3	3	3	0	3	3	3	1	0	3	1	1	2	3	0	3	1
143	0	21	0	0	0	0	0	0	1	3	0	0	0	3	2	3	3	3	3	3	3	3	1	0	3	3	3	0	0	2	0	0	1	3	3	3	1	3	3	3	3	0	0	0	0	0	0	0	3
144	1	20	0	2	2	3	2	2	1	1	2	2	2	3	3	1	3	3	3	3	2	3	1	2	3	3	3	3	2	2	1	2	2	3	1	3	3	3	3	2	2	1	0	3	1	0	2	1	2
145	0	21	0	0	1	1	0	2	1	1	1	2	2	0	1	1	2	2	1	2	1	1	1	2	2	1	2	3	3	2	2	1	1	2	2	0	1	1	2	1	2	1	1	2	1	0	2	0	2
146	1	20	0	1	2	2	0	2	3	1	1	2	1	2	1	2	2	3	3	2	1	3	1	1	1	1	3	0	2	1	2	1	2	1	2	1	2	2	1	1	0	1	2	1	1	1	2	1	2
147	0	20	0	1	1	0	0	1	3	3	2	0	2	2	2	0	1	0	0	3	2	1	2	2	0	1	1	1	1	2	1	3	2	2	2	0	2	1	1	0	0	3	2	3	0	2	3	0	1
148	1	20	0	0	3	3	2	3	3	2	1	3	2	1	1	1	3	1	1	3	3	3	1	2	2	1	3	1	3	2	3	3	1	2	3	0	3	2	3	1	0	2	1	3	0	3	1	1	1
149	1	20	0	0	2	2	1	2	2	2	0	1	1	1	0	1	1	1	2	2	1	2	1	1	1	1	1	0	1	1	1	2	1	0	1	0	2	1	1	1	1	1	1	2	0	1	2	0	1
150	1	29	1	0	2	0	0	1	1	1	0	0	0	0	0	0	2	1	1	1	0	1	0	0	0	0	0	0	0	0	1	1	0	0	0	0	1	0	0	2	2	1	0	3	0	0	2	0	3
151	1	26	1	2	2	3	1	2	3	1	1	2	1	2	2	1	3	1	1	2	2	2	2	3	3	2	3	2	3	3	2	3	3	2	1	1	1	3	2	1	1	2	0	2	0	0	1	0	2
152	1	20	0	0	3	3	2	3	3	2	2	2	2	1	3	3	3	3	3	2	2	3	1	3	3	3	3	2	3	3	3	2	3	2	3	2	3	2	3	0	1	2	0	2	0	1	1	2	1
153	1	19	0	0	3	3	3	3	3	3	1	3	2	1	2	1	3	1	3	3	3	3	1	2	2	1	3	1	3	1	2	2	1	1	2	1	2	3	2	0	1	2	1	0	2	2	2	2	1
154	0	21	1	1	1	1	0	0	1	0	1	1	1	0	0	0	1	0	1	1	2	0	0	0	0	0	1	0	1	0	0	1	0	1	0	1	1	1	2	2	1	1	1	2	0	0	1	1	1
155	1	25	0	2	3	3	3	3	3	3	3	3	2	2	2	2	3	2	3	3	2	3	1	2	2	2	2	2	3	1	2	2	1	2	2	2	3	2	3	1	0	2	1	2	2	1	1	1	2
156	0	24	0	0	2	2	0	1	2	1	1	1	0	1	0	0	2	0	2	2	1	1	0	1	0	1	2	0	1	1	1	0	0	0	1	0	1	1	1	1	2	1	1	1	0	1	2	0	1
157	1	20	0	1	3	2	1	2	3	2	1	1	1	1	1	1	2	1	2	3	2	3	2	2	2	1	3	1	3	1	3	3	1	3	2	1	2	2	3	1	1	3	0	2	2	2	1	1	1
158	1	20	0	1	2	2	2	2	3	2	2	3	2	1	3	2	2	3	2	2	2	2	1	2	1	2	2	1	2	1	1	1	2	2	2	2	1	3	2	2	2	1	0	2	0	0	2	0	2
159	1	20	0	0	3	2	1	1	3	2	1	3	2	2	2	3	2	3	3	3	2	3	2	3	2	2	2	2	3	3	2	2	2	2	2	2	2	2	2	0	0	3	1	2	1	1	2	2	1
160	1	26	0	2	3	2	3	1	3	2	1	3	1	0	1	3	3	3	3	2	2	3	1	2	2	0	3	1	2	2	2	1	3	1	2	0	1	3	2	0	1	1	0	1	0	1	1	0	3
161	1	24	1	1	2	2	2	2	2	2	2	2	2	2	1	1	3	1	3	2	2	2	2	2	2	3	3	2	2	1	1	2	2	1	1	0	1	3	1	2	2	1	0	2	0	1	2	2	2
162	1	23	0	1	3	2	1	3	3	2	0	2	2	0	1	1	2	1	2	3	1	3	0	2	1	1	1	1	3	1	2	1	1	1	1	1	1	3	2	1	1	3	0	1	1	1	2	3	1
163	1	19	0	0	3	3	3	3	3	3	1	1	1	2	1	0	1	0	2	3	1	3	1	3	2	3	2	0	3	2	2	3	2	1	2	1	3	3	3	0	1	3	3	0	2	3	2	3	0
164	1	20	0	0	2	2	0	2	3	3	1	2	1	0	0	1	1	2	2	2	0	2	0	2	3	1	2	0	3	2	2	1	2	2	2	2	1	2	2	2	1	1	2	2	1	1	2	1	2
165	1	26	1	1	2	3	2	2	3	2	1	2	2	1	1	1	2	1	2	2	3	3	1	3	3	2	3	2	2	2	2	1	2	2	2	1	1	3	1	2	2	1	0	2	0	1	2	0	3
166	1	20	0	1	3	2	1	2	2	1	1	2	0	1	0	2	2	2	3	3	2	3	1	2	2	2	1	1	2	2	1	2	1	3	1	3	1	3	2	1	1	1	0	1	0	3	1	0	1
167	1	20	0	1	3	3	3	2	3	2	1	3	3	2	1	2	2	1	2	3	2	2	2	2	2	3	3	1	2	1	3	2	3	2	2	2	3	3	2	2	1	1	1	1	1	3	2	0	1
168	0	41	1	0	1	1	0	1	2	2	0	2	0	0	0	1	1	1	2	1	1	1	0	1	1	2	1	2	1	1	1	0	2	1	2	0	2	1	2	2	2	1	0	3	0	0	2	0	3
169	0	22	0	1	3	1	1	2	3	2	1	1	1	1	1	0	1	1	1	1	1	3	1	2	2	1	1	2	2	2	2	1	2	2	2	1	3	1	2	0	0	3	2	0	2	1	0	3	0
170	1	21	0	1	3	1	2	3	3	1	0	0	0	1	1	1	1	1	2	2	2	2	1	1	1	2	1	1	1	0	0	1	1	0	1	3	2	3	1	1	0	2	1	2	1	0	2	1	1
171	0	21	0	0	1	0	0	2	1	0	0	1	1	1	0	1	2	1	1	1	0	1	0	2	1	1	1	0	0	0	1	0	1	1	1	0	2	3	1	2	2	1	0	2	1	0	1	0	2
172	0	20	0	0	2	0	0	2	2	2	2	2	1	0	0	0	1	1	2	1	0	1	2	2	1	0	0	0	2	0	1	1	1	0	0	0	0	0	0	2	2	1	1	3	1	0	3	0	3
173	1	20	0	0	3	2	1	2	3	2	1	3	1	3	1	0	2	2	1	2	2	2	1	3	2	2	3	0	3	1	2	1	2	1	2	3	2	3	2	1	1	2	2	1	0	1	1	0	2
174	0	21	0	0	2	1	2	1	3	2	2	1	2	2	2	3	2	2	1	1	3	3	2	2	2	3	3	3	3	2	3	2	2	2	3	2	3	3	3	3	2	3	2	2	3	0	1	1	2
175	1	20	0	3	3	3	2	2	3	3	3	3	2	2	2	1	2	1	1	1	2	2	2	2	2	1	1	2	2	2	2	2	0	1	1	0	1	1	1	1	1	2	2	2	2	2	3	1	2
176	0	29	1	0	1	1	0	1	1	1	0	1	1	1	0	0	0	0	0	1	1	1	0	1	1	1	1	0	0	1	1	0	0	1	1	0	1	0	1	3	3	0	0	3	0	0	3	0	3
177	0	19	0	0	1	0	0	1	2	2	0	0	0	1	0	1	0	1	0	2	0	1	0	1	0	0	0	0	0	1	1	1	0	0	1	0	0	0	1	2	2	1	0	3	0	0	1	0	2
178	1	21	0	0	1	2	2	1	2	1	1	2	0	1	0	2	1	2	2	2	2	2	2	2	1	1	1	1	1	0	1	2	1	2	2	0	2	2	1	1	1	2	1	1	2	0	3	0	3
179	1	20	0	3	3	3	0	1	3	2	2	3	2	3	3	3	3	3	3	3	3	2	2	3	2	2	3	2	3	3	3	2	2	2	2	2	2	3	3	1	1	0	1	1	0	1	3	0	3
180	0	28	0	0	0	1	0	1	1	0	1	0	0	1	2	0	1	1	1	1	0	2	1	3	2	0	0	1	2	0	0	0	1	1	2	0	1	3	2	1	1	2	0	1	2	0	3	1	1
181	1	31	1	1	2	2	1	2	2	2	1	1	1	0	1	1	1	1	2	2	1	2	1	1	1	1	1	1	1	1	1	1	1	1	1	0	1	1	1	2	2	1	0	2	0	0	2	0	2
182	1	32	0	0	2	2	2	2	2	0	1	2	1	0	0	1	2	0	2	1	1	3	1	1	1	0	2	1	1	1	1	0	1	0	1	0	1	3	1	2	2	1	0	3	0	0	2	0	2
183	0	20	0	0	2	1	0	1	1	0	1	0	0	1	0	1	2	3	3	2	1	2	1	1	0	0	1	0	1	2	1	0	1	0	1	0	0	0	1	1	1	2	0	2	0	0	2	0	2
184	1	20	0	3	3	3	3	2	3	2	2	3	2	3	2	3	3	3	3	3	3	2	2	3	3	3	3	3	3	2	2	2	2	2	2	2	2	3	3	1	1	1	0	2	0	0	3	0	2
185	1	20	0	3	3	3	3	3	3	2	2	2	3	3	3	3	3	2	3	3	3	3	1	3	3	3	3	3	3	3	3	3	2	2	3	3	3	3	3	3	3	1	0	3	0	0	3	0	3
186	1	26	1	0	3	3	1	2	2	1	0	1	1	0	1	0	1	0	1	1	1	0	0	2	1	3	1	1	1	1	1	0	0	0	1	0	1	1	1	1	1	0	0	1	0	0	1	1	1
187	1	30	1	1	2	1	1	1	2	1	1	2	1	3	1	1	3	1	2	1	1	2	0	1	2	3	2	1	2	2	3	2	3	1	2	2	1	2	1	1	1	1	1	1	0	0	1	9	9
188	0	20	0	0	2	2	0	0	2	1	1	0	0	0	0	2	0	0	2	0	0	1	1	0	1	0	1	0	2	2	0	0	0	1	1	0	1	0	3	3	3	0	0	2	0	0	2	0	2
189	1	19	0	0	3	2	0	2	3	1	3	1	2	3	2	0	2	3	3	3	1	3	1	3	1	3	3	0	3	1	3	1	3	0	0	3	2	3	3	2	2	3	1	2	0	0	0	0	2
190	1	41	0	1	3	3	3	3	3	2	1	2	1	1	1	1	2	1	2	3	2	2	1	2	1	1	2	2	3	2	2	2	2	1	1	0	1	1	2	2	1	1	1	2	0	0	3	0	1
191	0	24	0	3	0	0	0	0	0	0	0	0	0	0	0	1	0	2	2	3	3	1	0	0	0	0	3	3	0	1	0	0	0	0	2	0	0	1	0	3	3	0	0	3	0	0	0	3	0
192	0	22	0	1	1	0	1	1	1	1	0	1	1	1	0	0	1	2	1	2	0	1	0	0	1	1	2	0	2	2	2	1	2	1	1	0	1	1	2	2	2	1	0	2	0	0	2	0	2
193	1	22	0	1	1	0	0	1	2	1	0	1	0	0	0	1	1	0	1	2	0	1	0	1	0	0	0	1	1	0	1	0	1	0	0	0	1	1	1	1	1	2	1	1	2	1	1	2	1
194	1	19	0	0	2	1	0	2	3	2	1	1	0	2	0	0	2	1	1	3	0	3	1	2	1	1	2	1	2	2	2	1	1	1	0	0	1	0	3	1	1	3	2	2	2	0	2	0	2
195	1	50	1	1	0	1	0	1	1	1	1	1	1	0	1	0	1	0	1	1	1	1	0	0	1	0	1	0	1	0	0	1	0	0	1	0	0	1	0	1	2	0	0	3	0	2	1	1	2
196	1	20	0	0	2	2	2	3	3	2	2	2	1	1	1	1	2	3	3	2	1	3	0	1	1	1	3	1	3	2	2	1	1	0	1	1	3	3	1	2	1	2	0	1	2	3	0	3	1
197	1	20	0	1	3	3	1	3	3	2	3	3	2	1	1	3	2	3	3	2	2	3	0	2	2	2	3	2	3	2	2	1	3	1	1	2	3	2	2	2	2	1	1	3	1	1	3	1	2
198	1	20	0	0	1	1	0	0	1	1	1	1	0	0	1	0	2	1	2	2	1	1	0	0	1	1	0	0	1	1	1	1	0	0	1	1	1	1	1	2	2	1	0	2	1	3	0	2	2
199	1	25	1	1	3	2	2	3	2	2	2	2	2	1	2	3	3	3	2	2	1	2	1	2	3	2	3	1	1	1	1	2	1	1	1	0	1	2	2	3	3	3	0	0	1	0	0	0	0
200	1	27	0	3	2	2	2	3	2	0	2	1	2	2	2	2	3	3	3	2	2	1	1	2	2	3	1	2	1	1	1	1	1	0	1	1	2	3	2	2	2	1	0	2	0	0	2	0	2
201	1	20	0	2	3	2	2	2	3	2	1	2	1	1	2	3	1	3	2	1	3	2	1	2	1	2	3	2	2	1	2	1	2	1	1	1	1	3	1	1	1	0	0	2	0	0	1	0	2
202	1	21	0	0	3	3	3	3	3	3	2	1	1	1	2	3	3	3	3	3	3	3	2	3	2	1	3	1	3	2	2	2	3	1	2	2	1	3	2	3	2	1	0	3	0	1	2	0	2
203	1	20	0	0	2	3	1	3	3	3	2	3	0	1	0	3	3	3	3	3	3	3	2	3	3	2	3	1	2	2	2	1	0	2	1	2	3	2	3	3	2	1	0	3	1	0	3	0	3
204	1	20	0	2	3	2	3	2	3	3	2	2	1	2	1	3	3	3	2	3	2	3	1	2	1	2	3	2	3	1	1	1	2	1	1	2	1	3	1	2	2	1	0	3	1	1	2	0	2
205	0	20	0	0	2	1	1	1	3	1	0	1	1	0	0	0	1	1	2	1	0	0	1	1	0	0	0	0	1	1	1	2	0	0	1	0	1	1	3	2	1	1	0	2	0	0	3	0	2
206	0	20	0	0	1	2	1	1	1	0	0	1	0	0	0	1	1	2	2	1	0	1	0	1	2	1	2	0	1	0	0	0	1	0	1	0	1	0	2	3	2	0	0	3	0	0	2	0	3
[truncated: 45 more columns]
